# Supplementary material
Source: publisher figshare collection journal article supplement (https://acs.figshare.com/ndownloader/files/11357939)
Supplement: Supplementary file 1 [file 11357939]

# Non-wettable hierarchical structure effect on droplet impact and spreading dynamics

*Hyungmo Kim<sup>1</sup> and Seol Ha Kim<sup>2,\*</sup>*

<sup>1</sup>SFR NSSS Design Division, KAERI, Daejeon, 34057, Republic of Korea

<sup>2</sup>Center of Heat and Mass Transfer, Institute of Engineering Thermophysics, Chinese Academy of Sciences, Beijing, 100190, China

1. Representative videos of the droplet impact and rebounding.

Table S1 summarized the detail information and experimental condition of the supplementary videos of droplet impacts that are depicted in the Figure 2.

| <b>File Name</b>                 | <b>Samples</b>     | <b>Droplet Volume [<math>\mu</math>L]</b> | <b><i>We</i>#</b> | <b><i>Re</i>#</b> |
|----------------------------------|--------------------|-------------------------------------------|-------------------|-------------------|
| <b>Video #1 S0 2uL (We# 60)</b>  | <b>S0</b>          | <b>2</b>                                  | <b>63</b>         | <b>2646</b>       |
| <b>Video #2 S0 2uL (We# 120)</b> | <b>S0</b>          | <b>2</b>                                  | <b>122</b>        | <b>3670</b>       |
| <b>Video #3 S0 4uL (We# 220)</b> | <b>S0</b>          | <b>4</b>                                  | <b>214</b>        | <b>5561</b>       |
| <b>Video #4 S2 2uL (We# 60)</b>  | <b>S2 (G30S30)</b> | <b>2</b>                                  | <b>58</b>         | <b>2568</b>       |
| <b>Video #5 S2 4uL (We# 220)</b> | <b>S2 (G30S30)</b> | <b>4</b>                                  | <b>233</b>        | <b>5793</b>       |

Table S1. Information of the supplementary videos
